# Supplementary material for: Direct observation of aluminium ions produced via pulsed laser ablation in liquid: a ‘turn-on’ fluorescence study
Source: Royal Society of Chemistry journal article supplement (doi:10.1039/c2cp42463k), 2012-01-01
Supplement: c2cp42463k.pdf [file c2cp42463k.pdf]

## Supporting Information

-for-

### **Direct observation of aluminum ions produced via pulsed laser ablation in liquid: a ‘turn-on’ fluorescence study**

Seulki Lee, Ahreum Ahn, and Myong Yong Choi\*

*Department of Chemistry and Research Institute of Natural Science, Gyeongsang National University, Jinju 660-701, Republic of Korea*

\*Corresponding author

Tel.: +82 55 772 1492 (M. Y. Choi)

E-mail address: [mychoi@gnu.ac.kr](mailto:mychoi@gnu.ac.kr) (M. Y. Choi)

Keywords: Aluminum nanoparticles, Al<sub>2</sub>O<sub>3</sub> nanoparticles, SalophenH<sub>2</sub>, [Al(salophen)]<sup>+</sup> complex, Pulsed laser ablation in liquid (PLAL)

## Table of Contents

|                  |       |           |
|------------------|-------|-----------|
| <b>Figure S1</b> | ..... | <b>S3</b> |
| <b>Figure S2</b> | ..... | <b>S4</b> |
| <b>Figure S3</b> | ..... | <b>S6</b> |

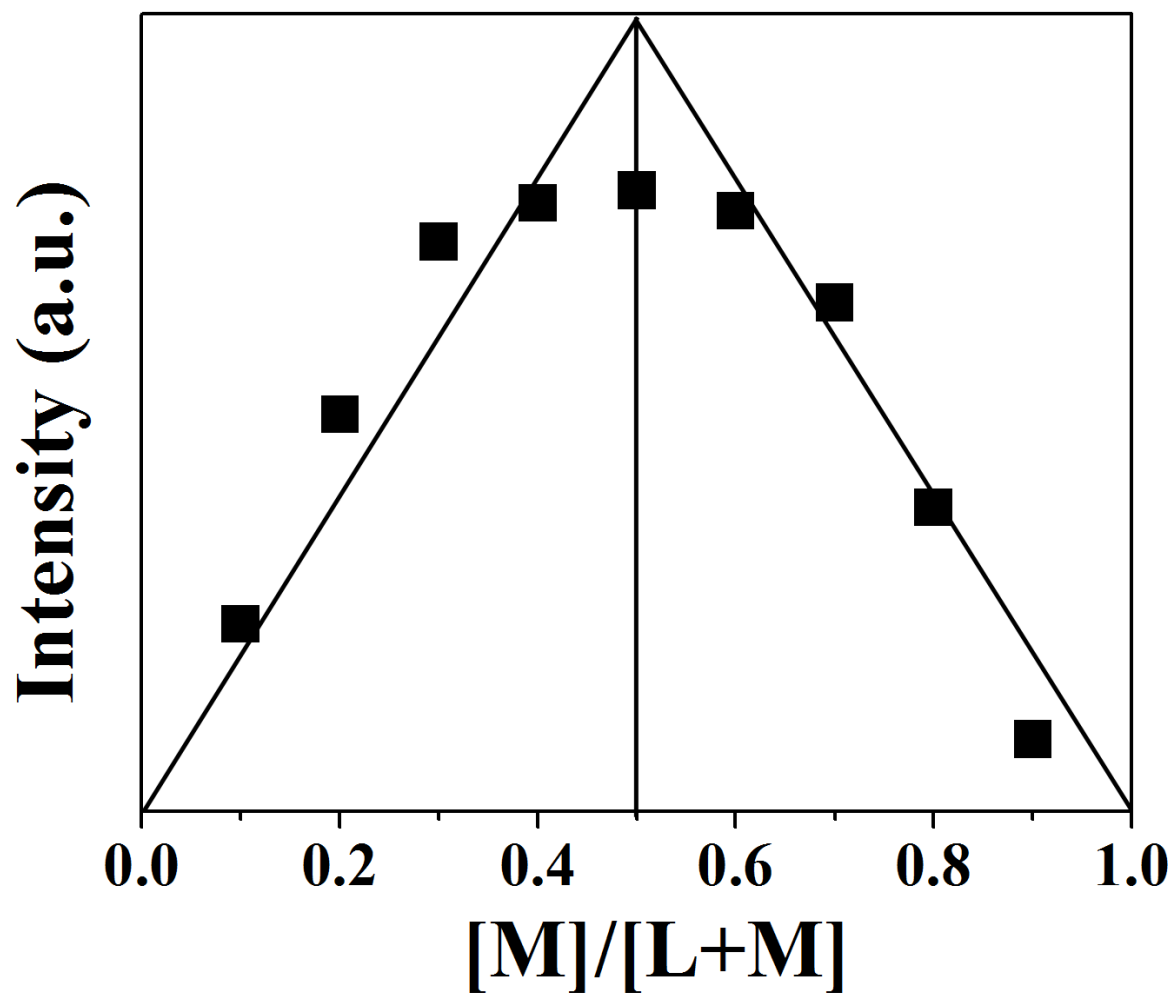

**Figure S1:** Job's plot analysis of the fluorescence titration spectra for the complexation of  $\text{Al}^{3+}$  with  $\text{LH}_2$ , showing a maximum at a mole fraction of 0.5 with a symmetrical peak. This indicates a 1:1 complex,  $[\text{AlL}]^+$ , between ligand  $\text{L}^{2-}$  and the  $\text{Al}^{3+}$  ion.

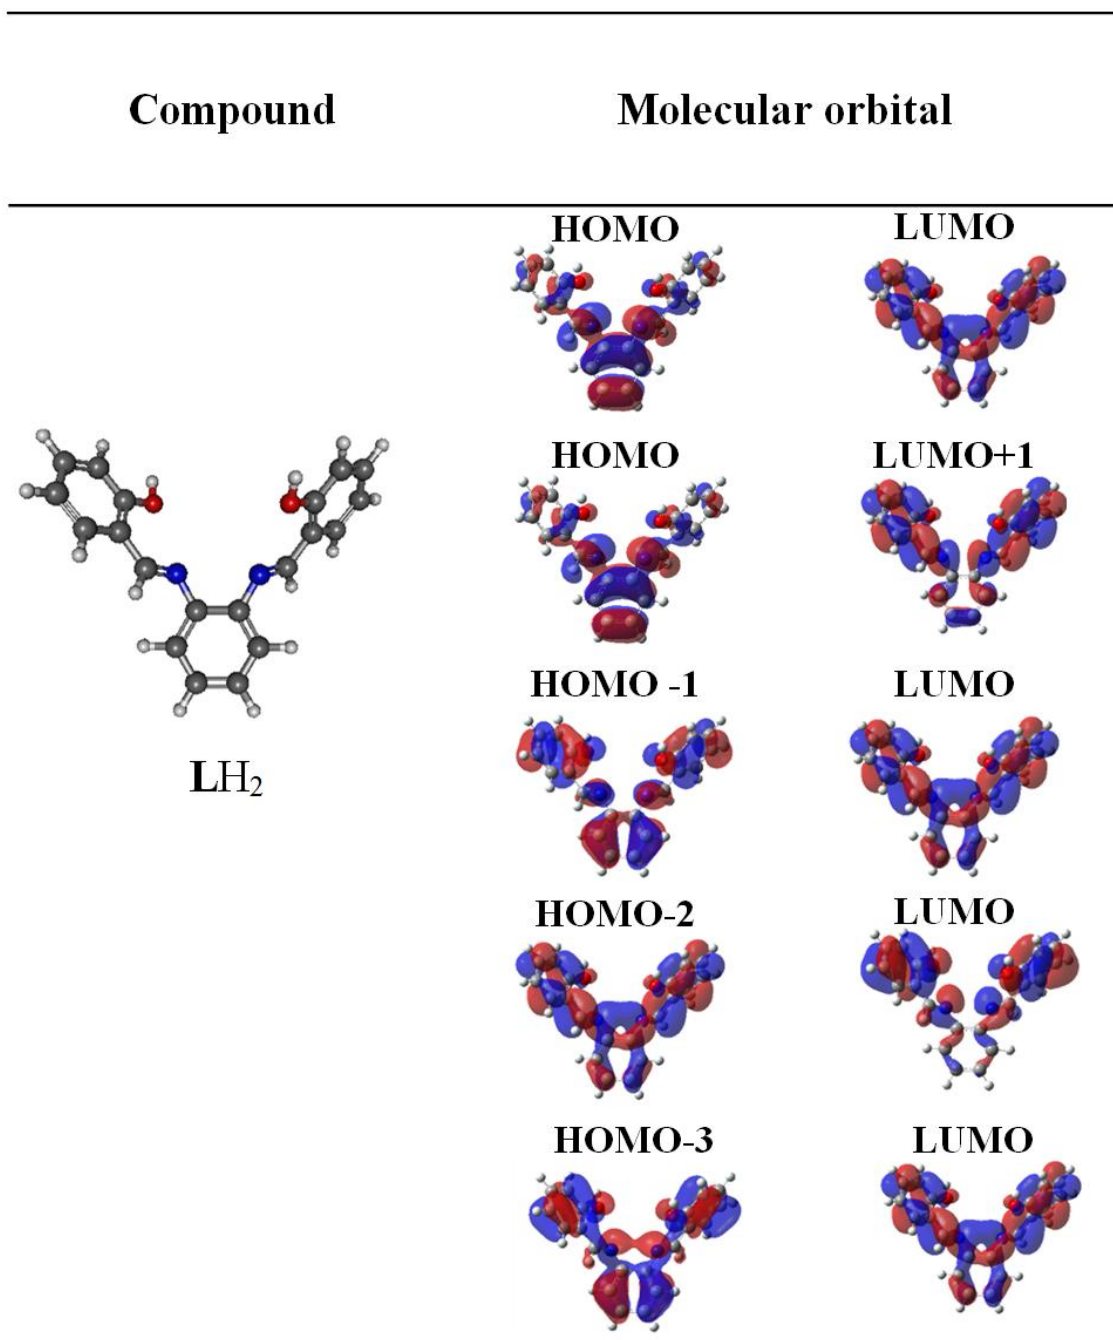

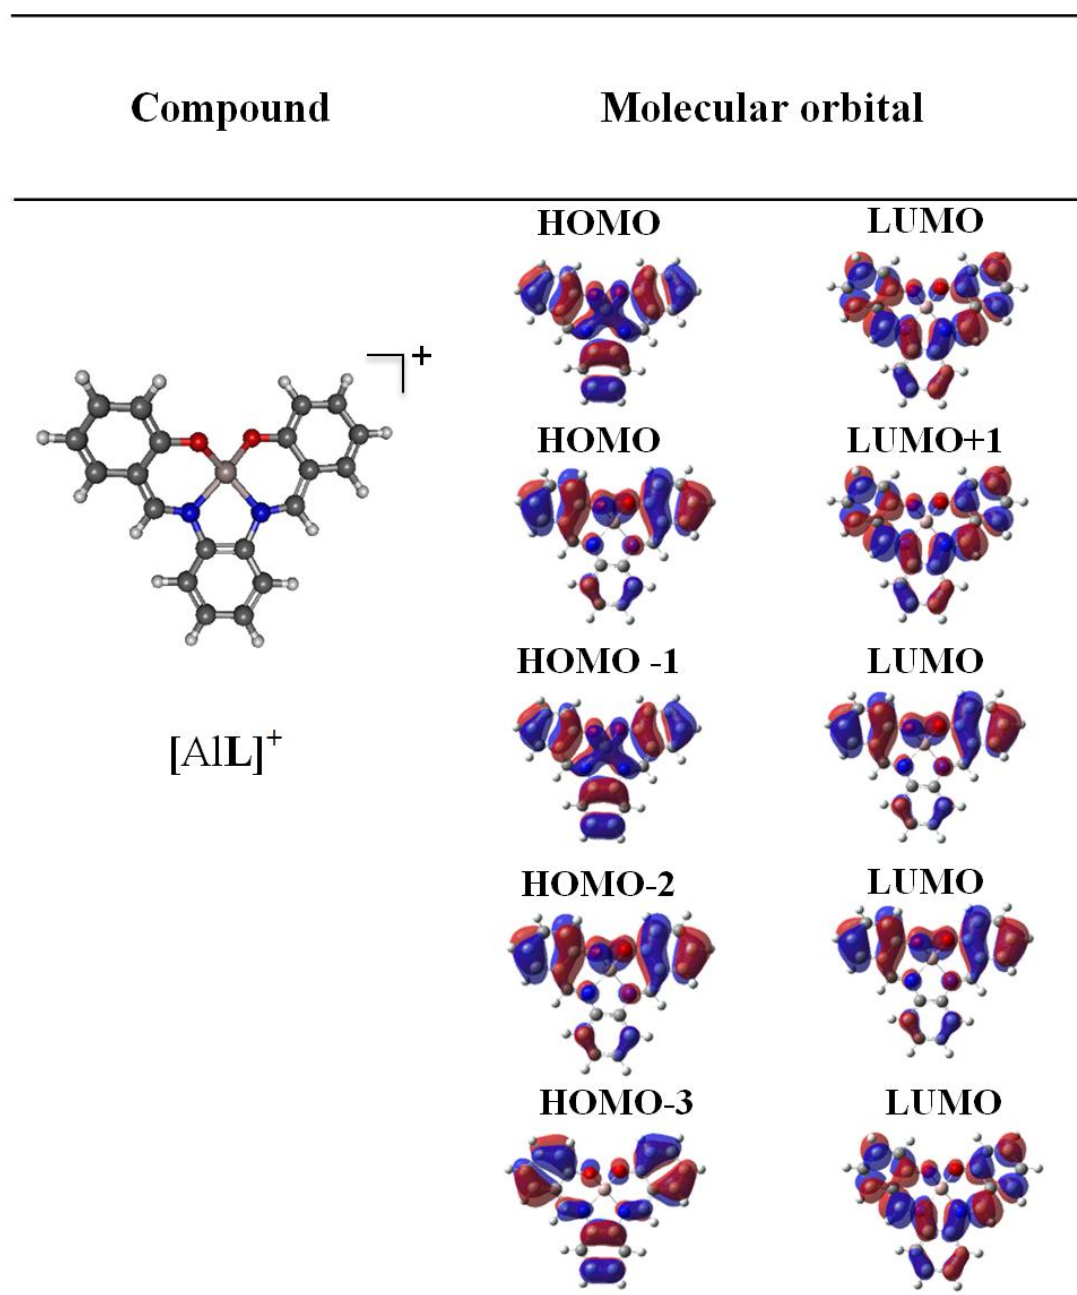

**Figure S2:** Optimized structures and molecular orbitals of LH<sub>2</sub> and [AIL]<sup>+</sup> calculated by TD-DFT method at the B3LYP/6-31G\* level using Gaussian 09.

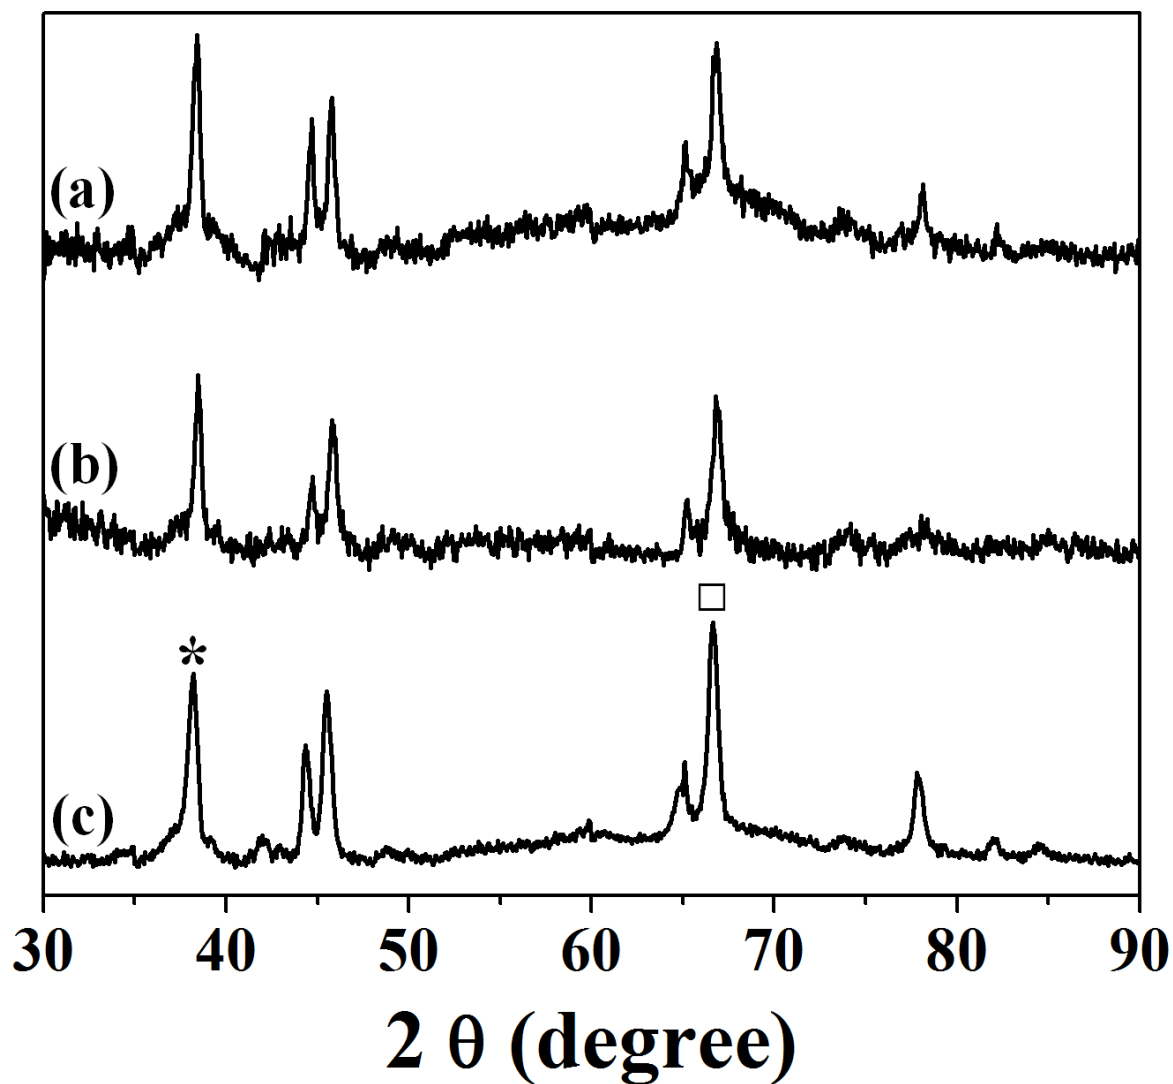

**Figure S3:** XRD patterns of the nanoparticles produced by PLAL with (a) degassing, (b) O<sub>2</sub> bubbling, and (c) H<sub>2</sub> bubbling conditions. The major peaks of Al and  $\gamma$ -Al<sub>2</sub>O<sub>3</sub> nanoparticles are marked by an asterisk and square, respectively.
